# Supplementary material
Source: Springer Nature journal article supplement (https://www.springerprofessional.de/resource/supplementary/13638_2012_834_MOESM5_ESM.pdf/11898590)

Simulation v.s. Theoretical (30 users without multipath channel)

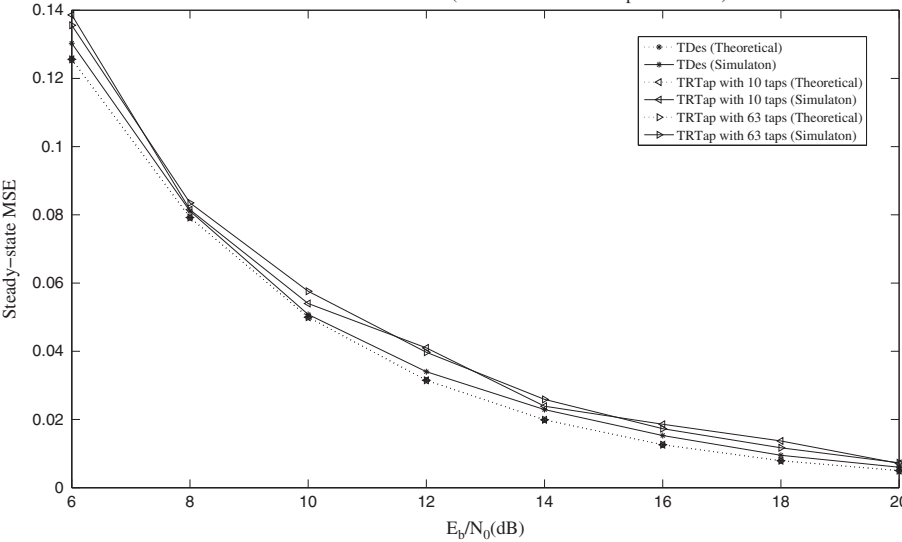

Supplement: MOESM5 [file 11898590]
